# Supplementary material for: Assessing the Effectiveness of a Far-Red Fluorescent Reporter for Tracking Stem Cells In Vivo
Source: PubMed Central journal article supplement (PMC5795970; doi:10.3390/ijms19010019), 2017-12-22
Supplement: ijms-19-00019-s001.pdf [file ijms-19-00019-s001.pdf]

Supplementary Materials: 'Assessing the Effectiveness of a Far-red Fluorescent Reporter for Tracking Stem Cells *In Vivo*' by Zhou *et al*

Table S1. Tumour monitoring record post injection of *Bra-GFP/Rosa26-E2C* mESCs

| Mouse No. | Cell Lines | Cell No. (Million) | Day 4  |        |        |        | Day 7  |        |        |        | Day 9  |        |        |        |
|-----------|------------|--------------------|--------|--------|--------|--------|--------|--------|--------|--------|--------|--------|--------|--------|
|           |            |                    | Wt (g) | L (mm) | W (mm) | H (mm) | Wt (g) | L (mm) | W (mm) | H (mm) | Wt (g) | L (mm) | W (mm) | H (mm) |
| 1         | E2C        | 10                 | 19.34  | 5.1    | 6.2    | 2.0    | 19.15  | N/A    | N/A    | N/A    | 19.52  | N/A    | N/A    | N/A    |
|           |            | 7.5                |        | N/A    | N/A    | N/A    |        | N/A    | N/A    | 6.4    |        | 4.5    | 3.5    |        |
|           |            | 5                  |        | N/A    | N/A    | N/A    |        | N/A    | N/A    | 4.4    |        | 4.4    | 2.2    |        |
| 2         | E2C        | 10                 | 17.00  | N/A    | N/A    | N/A    | 17.55  | 6.8    | 6.7    | 4.0    | 17.72  | 9.2    | 9.0    | 7.7    |
|           |            | 7.5                |        | N/A    | N/A    | N/A    |        | 5.2    | 5.3    | 3.0    |        | 9.6    | 8.9    | 6.4    |
|           |            | 5                  |        | N/A    | N/A    | N/A    |        | 4.0    | 4.9    | 3.0    |        | 9.0    | 6.8    | 4.7    |
| 3         | E2C        | 10                 | 18.20  | N/A    | N/A    | N/A    | 20.45  | 3.6    | 3.3    | 3.0    | 20.88  | 5.4    | 5.4    | 3.0    |
|           |            | 7.5                |        | N/A    | N/A    | N/A    |        | 8.5    | 5.2    | 3.0    |        | 9.9    | 9.7    | 5.3    |
|           |            | 5                  |        | N/A    | N/A    | N/A    |        | 7.0    | 7.0    | 3.0    |        | 9.7    | 9.6    | 6.7    |
|           | Ctrl       | 10                 | N/A    | N/A    | N/A    | 3.0    | 3.0    | 1.0    | 4.8    | 3.4    | 1.0    |        |        |        |
|           | Ctrl       | 10                 |        | N/A    | N/A    | N/A    | 3.0    | 3.0    | 1.0    |        | 5.5    | 4.8    | 3.2    |        |

(Wt, weight; L, length; W, width; H, height; E2C, *Bra-GFP/Rosa26-E2C* mESCs; Ctrl, untransfected *E14-Bra-GFP* mESCs)

**Table S2.** Tumour volume and *in vivo* monitoring record post injection of *Bra-GFP/Rosa26-E2C* mESCs

| Cell Lines | Cell No. (Million) | Mouse No. | ROI Radiance (e+08) (p/sec/cm <sup>2</sup> /sr) |        |        |        |        | Volume (mm <sup>3</sup> ) |         |         |          |
|------------|--------------------|-----------|-------------------------------------------------|--------|--------|--------|--------|---------------------------|---------|---------|----------|
|            |                    |           | Day 0                                           | Day 1  | Day 4  | Day 7  | Day 9  | Day 4                     | Day 7   | Day 9   |          |
| E2C        | 10                 | 1         | 2.127                                           | 1.368  | 2.376  | 1.881  | 1.834  | 33.11                     | 0.00    | 0.00    |          |
|            |                    | 2         | 2.142                                           | 1.305  | 2.275  | 2.276  | 2.480  | 15.67                     | 19.79   | 44.10   |          |
|            |                    | 3         | 2.723                                           | 1.908  | 4.135  | 3.933  | 3.122  | 36.44                     | 69.43   | 266.49  |          |
|            |                    | Mean      | 2.331                                           | 1.527  | 2.929  | 2.697  | 2.479  | 28.41                     | 29.74   | 103.53  |          |
|            |                    |           |                                                 | ±0.340 | ±0.331 | ±1.046 | ±1.089 | ±0.644                    | ±11.159 | ±35.768 | ±142.840 |
|            | 7.5                | 1         | 2.657                                           | 1.780  | 2.981  | 3.129  | 3.109  | 0.00                      | 0.00    | 52.78   |          |
|            |                    | 2         | 2.243                                           | 1.447  | 2.983  | 2.639  | 2.749  | 0.00                      | 43.29   | 286.31  |          |
|            |                    | 3         | 1.742                                           | 1.174  | 2.330  | 2.860  | 2.416  | 0.00                      | 76.97   | 326.68  |          |
|            |                    | Mean      | 2.214                                           | 1.467  | 2.813  | 2.876  | 2.758  | 0.00                      | 40.09   | 221.92  |          |
|            |                    |           |                                                 | ±0.458 | ±0.303 | ±0.376 | ±0.245 | ±0.347                    | ±0.000  | ±38.584 | ±147.866 |
|            | 5                  | 1         | 2.180                                           | 1.580  | 2.459  | 2.528  | 2.546  | 0.00                      | 0.00    | 22.30   |          |
|            |                    | 2         | 1.821                                           | 1.318  | 2.869  | 2.017  | 2.127  | 0.00                      | 30.79   | 150.61  |          |
| 3          |                    | 1.705     | 1.659                                           | 2.475  | 2.429  | 2.608  | 0.00   | 4.71                      | 8.55    |         |          |
| Mean       |                    | 1.902     | 1.519                                           | 2.601  | 2.325  | 2.427  | 0.00   | 11.83                     | 60.48   |         |          |
|            |                    |           | ±0.248                                          | ±0.178 | ±0.232 | ±0.271 | ±0.262 | ±0.000                    | ±16.583 | ±78.351 |          |
| Ctrl       | 10                 | 1         | 1.419                                           | 1.115  | 1.849  | 1.459  | 1.475  | 0.00                      | 95.42   | 333.83  |          |
|            |                    | 2         | 1.826                                           | 1.448  | 2.933  | 1.895  | 2.227  | 0.00                      | 18.66   | 45.80   |          |
|            |                    | 3         | 2.122                                           | 1.357  | 3.517  | 2.361  | 2.861  | 0.00                      | 4.71    | 44.23   |          |
|            |                    | Mean      | 1.789                                           | 1.307  | 2.766  | 1.905  | 2.188  | 0.00                      | 39.60   | 141.29  |          |
|            |                    |           |                                                 |        | ±0.353 | ±0.172 | ±0.846 | ±0.451                    | ±0.694  | ±0.000  | ±48.844  |

(ROI, region of interest; E2C, *Bra-GFP/Rosa26-E2C* mESCs; Ctrl, untransfected *E14-Bra-GFP* mESCs)
